# Supplementary material for: Multi-scale integrated design and fabrication of ultrathin broadband microwave absorption utilizing carbon fiber/Prussian blue/Fe3O4-based lossy lattice metamaterial
Source: Royal Society of Chemistry journal article supplement (doi:10.1039/d1tc00511a), 2021-01-01
Supplement: d1tc00511a1.pdf [file d1tc00511a1.pdf]

## Multi-scale Integrated Design and Fabrication of **Ultrathin Broadband Microwave Absorption Utilizing Carbon fiber/Prussian blue/Fe<sub>3</sub>O<sub>4</sub>-based Lossy Lattice Metamaterial**

Yuexuan Li<sup>a</sup>, Yugang Duan<sup>\*a</sup>, Xiaoqing Kang<sup>a</sup>

<sup>a</sup>State Key Lab for Manufacturing Systems Engineering, School of Mechanical Engineering, Xi'an Jiaotong University, Xi'an 710054, China

\*Correspondence: [ygduan@mail.xjtu.edu.cn](mailto:ygduan@mail.xjtu.edu.cn)

It is obvious that the peak of 2065.48 cm<sup>-1</sup> and 486.48 cm<sup>-1</sup> represents the vibration of -CN group and -Fe<sup>3+</sup>-CN-Fe<sup>2+</sup> bond for PB (**Fig. S1a**). The characteristic peak located at 531.31 cm<sup>-1</sup> suggests the existence of the -Fe-O bond for Fe<sub>3</sub>O<sub>4</sub> NPs. After coating with PB, the new vibrational peaks located at 2065.48 cm<sup>-1</sup> and 492.88 cm<sup>-1</sup> are attributed to the -C≡N bond and -Fe<sup>3+</sup>-CN-Fe<sup>2+</sup> bond, confirming that the successful formation of PB. Moreover, the XRD pattern of Fe<sub>3</sub>O<sub>4</sub> NPs (PDF#19-0629), PB (Fe<sub>4</sub>[Fe(CN)<sub>6</sub>]<sub>3</sub>, PDF#73-0678) and PB/Fe<sub>3</sub>O<sub>4</sub> composite are shown in **Fig. S1b**. It is revealed that two new diffraction peaks of 17.533° and 24.889° in PB/Fe<sub>3</sub>O<sub>4</sub> are attributed to the (200) and (220) planes of the PB. It further suggests the presence of PB in PB/Fe<sub>3</sub>O<sub>4</sub> nanocomposite.

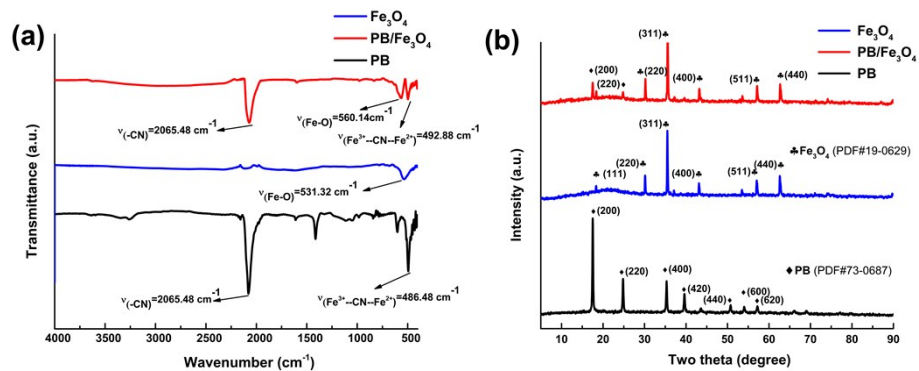

Fig. S1 FT-IR (a) and XRD (a) spectrum of PB/Fe<sub>3</sub>O<sub>4</sub> nanocomposite.

Table. 1 Different weight fractions of the SCF/PB/Fe<sub>3</sub>O<sub>4</sub>/EP composite

| Materials                               | S(10,10) | S(10,20) | S(5,10) | S(5,20) | S(0,20) |
|-----------------------------------------|----------|----------|---------|---------|---------|
| SCF (wt%)                               | 10       | 10       | 5       | 5       | 0       |
| PB/Fe <sub>3</sub> O <sub>4</sub> (wt%) | 10       | 20       | 10      | 20      | 20      |

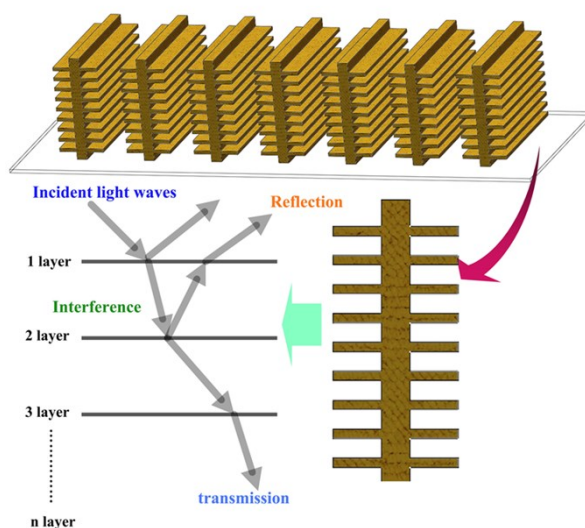

Fig. S2 3D Morpho-butterfly scale nanostructure and the colour reflection mechanism.

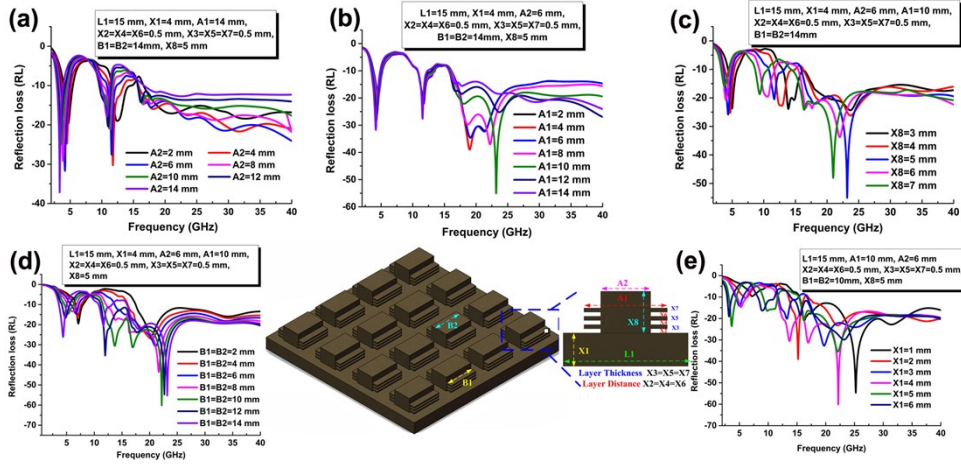

**Fig. S3** Optimal parameters of the periodic unit of the BSM absorber.

With an increase in  $A_2$ , the effect of the microwave absorption frequency is approximately focused on the 5 GHz and 12 GHz. The absorber with  $A_2=14$  mm exhibits the strong  $RL$  ability ( $RL_{max}=-37.1$  dB) in lower frequency point, nevertheless, the absorber of  $A_2=6$  mm possesses a broad bandwidth than that of the  $A_2=14$  mm (**Fig. S3a**). Moreover, the change of the  $A_1$  has a remarkable effect on the microwave absorption performance ranging from 15 GHz to 23 GHz. It is illustrated that the  $A_1=10$  mm is an optimal result, exhibiting the maximum  $RL$  value ( $RL_{max}=-55$  dB) and the broad bandwidth of -26.46 GHz below -10 dB (**Fig. S3b**). Similarly, with increase  $X_8$  thickness, the frequency resonance of the BSM absorber has the same trend as those of the  $A_1$ , as illustrated in **Fig. S3c**. Interestingly, the length of the  $B_1=B_2$  has a major effect on microwave absorption at the high absorption frequency. **Fig. S3d** displays the optimal microwave absorption bandwidth ( $RL < -9.5$  GHz) of 30.32 GHz frequency with  $B_1=B_2=10$  mm. Moreover, as shown in **Fig. S3e**, there is a maximum absorption peak at the  $L_1$  thickness of 4 mm.

**Table. 2** Optimized parameters of the periodic unit for the BSM absorber

| Parameter | L1 | X1 | A1 | X2 | A2 | X3  | B1 | B2 | X8 | Equivalent plate thickness |
|-----------|----|----|----|----|----|-----|----|----|----|----------------------------|
| Size (mm) | 15 | 4  | 10 | 1  | 6  | 0.5 | 10 | 10 | 5  | 5.42                       |

According to the Debye theory, one single semicircle represents once interfacial polarization relaxation processes. The *Cole-Cole* Debye equation between  $\epsilon'$  and  $\epsilon''$  as followed below<sup>1, 2</sup>:

$$\left(\epsilon' - \frac{\epsilon_s + \epsilon_\infty}{2}\right)^2 + (\epsilon'')^2 = \left(\frac{\epsilon_s - \epsilon_\infty}{2}\right)^2 \quad (1)$$

Where  $\epsilon_s$  and  $\epsilon_\infty$  stand for the static dielectric and the relative dielectric at an infinite frequency, respectively.

Moreover, the attenuation constant  $\alpha$  is the judgement standard for the microwave absorption performance. Generally, the equation can be expressed as followed<sup>3-5</sup>:

$$\alpha = \frac{\sqrt{2}\pi f}{c} \times \sqrt{(\mu''\epsilon'' - \mu'\epsilon') + \sqrt{(\mu'\epsilon'' + \mu''\epsilon')^2 + (\mu''\epsilon'' - \mu'\epsilon')^2}} \quad (2)$$

Where  $f$  is frequency and  $c$  is the velocity of the light.

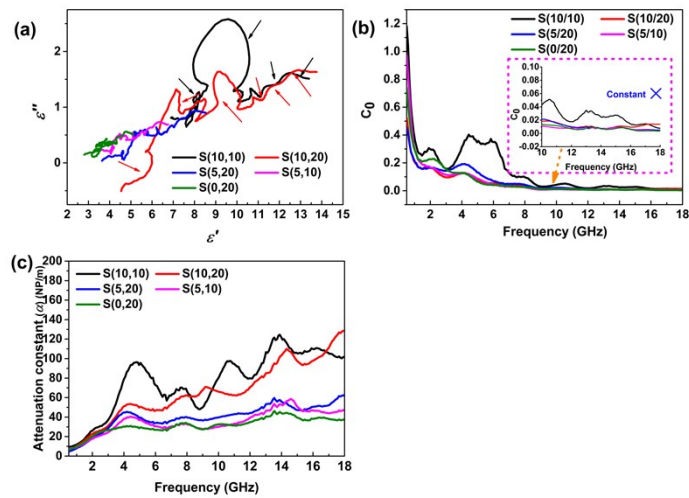

**Fig. S4** *Cole-Cole* curves (a), the  $C_0$ - $f$  curves (b) and the attenuation constant  $\alpha$ - $f$  curves (c) of all the samples.

To further investigate the role of the PB in the complex electromagnetic (EM) absorption process, the SCF/PB/Fe<sub>3</sub>O<sub>4</sub>/wax and SCF/Fe<sub>3</sub>O<sub>4</sub>/wax with the SCF(10 wt%), PB/Fe<sub>3</sub>O<sub>4</sub> (20wt%), or Fe<sub>3</sub>O<sub>4</sub> (20wt%) was fabricated and their EM properties of all samples have exhibited in **Fig. S5**. After Fe<sub>3</sub>O<sub>4</sub> encapsulated with PB, the SCF/PB/Fe<sub>3</sub>O<sub>4</sub> composite possesses the undesired permittivity ( $\epsilon'$  and  $\epsilon''$ ) values. Based on the free electron theory,  $\epsilon'' \propto 1/2\pi\rho\epsilon_0 f$ , where  $\rho$  refers to the resistivity, this indicates that PB-encapsulated SCF/PB/Fe<sub>3</sub>O<sub>4</sub> has limited the original conductivity. For the complex permeability, the PB-encapsulated SCF/PB/Fe<sub>3</sub>O<sub>4</sub> keeps the better real part of the permeability ( $\mu'$ ) at the range of the 6-18 GHz, suggesting that the addition of PB contributes to improving the ability of the magnetic storage. The imaginary part of the permeability ( $\mu''$ ) have no obvious difference among the SCF/PB/Fe<sub>3</sub>O<sub>4</sub> and SCF/Fe<sub>3</sub>O<sub>4</sub>. (**Fig. S5c-d**). As exhibited in **Fig. S5e-f**, the  $\tan\delta_\epsilon$  and  $\tan\delta_\mu$  values of the SCF/PB/Fe<sub>3</sub>O<sub>4</sub> are lower than those of the SCF/Fe<sub>3</sub>O<sub>4</sub>, illustrating that the slightly lower EM attenuation ability of the SCF/PB/Fe<sub>3</sub>O<sub>4</sub> is attributed to the PB-encapsulated Fe<sub>3</sub>O<sub>4</sub>.

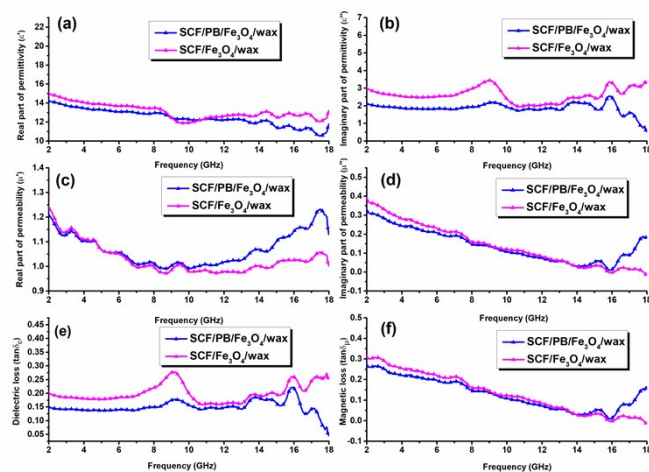

**Fig. S5** Electromagnetic properties of SCF/PB/Fe<sub>3</sub>O<sub>4</sub>/wax and SCF/Fe<sub>3</sub>O<sub>4</sub>/wax composite.

Moreover, as shown in **Fig. S6a**, the PB-encapsulated SCF/PB/Fe<sub>3</sub>O<sub>4</sub> composite

have more semi-circles than those of SCF/Fe<sub>3</sub>O<sub>4</sub>, suggesting that PB plays an important role in the enhancement of the polarization relaxation process in the microwave radiation process. Meanwhile,  $C_0$  values of SCF/PB/Fe<sub>3</sub>O<sub>4</sub> and SCF/Fe<sub>3</sub>O<sub>4</sub> are not a constant, implying that their similarly magnetic loss are attributed to the natural resonance rather than the eddy current effect (**Fig. S6b**). **Fig. S6c** suggests that the attenuation ability of the SCF/PB/Fe<sub>3</sub>O<sub>4</sub> gets worse after the addition of PB.

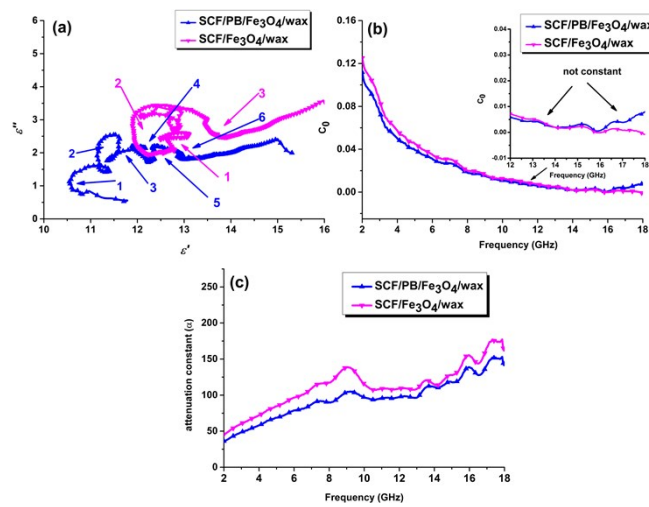

**Fig. S6** Cole-Cole curves (a), the  $C_0$ - $f$  curves (b) and the attenuation constant  $\alpha$ - $f$  curves (c) of SCF/PB/Fe<sub>3</sub>O<sub>4</sub>/wax and SCF/Fe<sub>3</sub>O<sub>4</sub>/wax composite.

Except for the excellent electromagnetic loss ability, suitable impedance matching is necessary for absorption materials. Here, the impedance matching properties can be expressed in the equation  $|Z_r| = \left| \frac{Z_{in}}{Z_0} \right|$ , when the  $|Z_r|$  is closed to 1, implying that the perfect electromagnetic absorption performance. As shown in **Fig. S7a-b**, the addition of PB is beneficial to optimize the impedance matching. Therefore, the SCF/PB/Fe<sub>3</sub>O<sub>4</sub> composite possesses better impedance matching in comparison to the SCF/Fe<sub>3</sub>O<sub>4</sub>. Thus, the PB-encapsulated SCF/PB/Fe<sub>3</sub>O<sub>4</sub> possesses a stronger reflection loss and efficiency bandwidth (**Fig. 7Sc-d**).

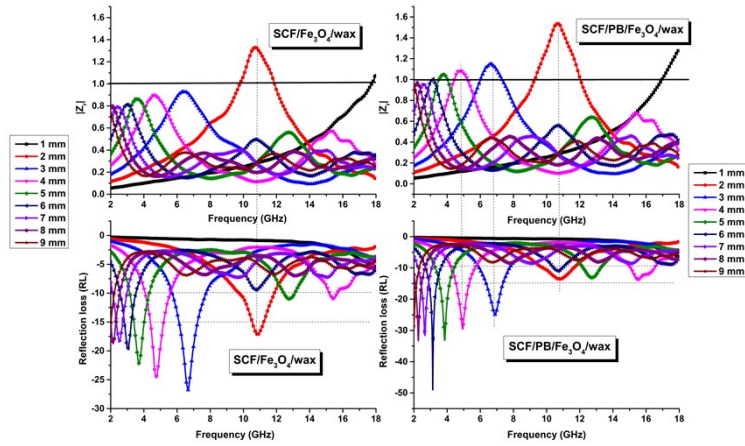

**Fig. S7** The complex impedance matching properties ( $|Z_r|$ ) (a) and reflection loss (RL) (b) of SCF/PB/ $\text{Fe}_3\text{O}_4$ /wax and SCF/ $\text{Fe}_3\text{O}_4$ /wax composite.

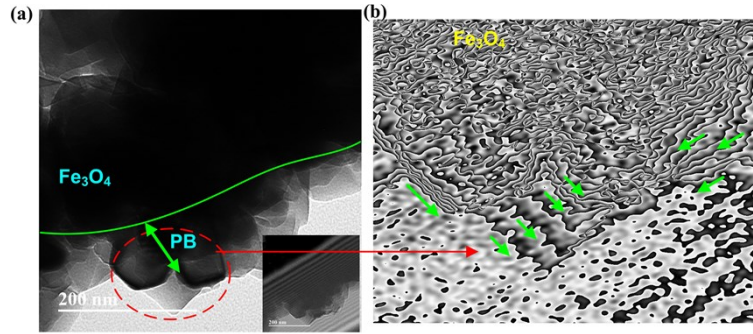

**Fig. S8** TEM image and holograph image (a), the corresponding distribution of magnetic flux lines (b) of PB/ $\text{Fe}_3\text{O}_4$  nanocomposite.

**Table. 3** Comparison of EMA performance of the previously investigated absorbers.

| Absorber type                                    | Filler (wt%)          | Absorption | EBD <sup>a</sup> (GHz) | Ref.      |
|--------------------------------------------------|-----------------------|------------|------------------------|-----------|
| Water droplet-based absorber                     | -----                 | 90%        | 17.6                   | 6         |
| Double split-ring microstructure absorber        | -----                 | 90.63%     | 9.43                   | 7         |
| $\text{Fe}_3\text{O}_4$ @C/rGO-20 absorber       | 11                    | 90%        | 6.72                   | 8         |
| GNs/FCIP/epoxy/silicone absorber                 | 72                    | 74.9%      | 12.6                   | 9         |
| FCIP/Wax                                         | 20/60/75 <sup>b</sup> | 91%        | 26.85                  | 10        |
| CI/MWCNT/EP/CF/GF                                | 72.744                | 90%        | 16.31                  | 11        |
| SCF/PB/ $\text{Fe}_3\text{O}_4$ /EP              | 30                    | 88.7%      | 29.54                  | This work |
| SCF/PB/ $\text{Fe}_3\text{O}_4$ /EP <sup>c</sup> | 30                    | 90%        | 35                     | This work |

<sup>a</sup>EAB: Effective absorption bandwidth      <sup>b</sup>20wt%(1 layer)+60wt%(2 layer)+75wt%(3 layer)  
<sup>c</sup>TM=50° polarization

## Reference

1. X. L. Li, X. W. Yin, H. L. Xu, M. K. Han, M. H. Li, S. Liang, L. F. Cheng and L. T. Zhang, *Acs Appl Mater Inter*, 2018, **10**, 34524-34533.
2. B. Quan, X. H. Liang, X. Zhang, G. Y. Xu, G. B. Ji and Y. W. Du, *Acs Appl Mater Inter*, 2018, **10**, 41535-41543.
3. J. S. Deng, X. Zhang, B. Zhao, Z. Y. Bai, S. M. Wen, S. M. Li, S. Y. Li, J. Yang and R. Zhang, *J Mater Chem C*, 2018, **6**, 7128-7140.
4. H. Pang, W. H. Pang, B. Zhang and N. Ren, *J Mater Chem C*, 2018, **6**, 11722-11730.
5. L. Y. Liang, G. J. Han, Y. Li, B. Zhao, B. Zhou, Y. Z. Feng, J. M. Ma, Y. M. Wang, R. Zhang and C. T. Liu, *Acs Appl Mater Inter*, 2019, **11**, 25399-25409.
6. J. Xie, W. Zhu, I. D. Rukhlenko, F. Xiao, C. He, J. Geng, X. Liang, R. Jin and M. Premaratne, *Opt Express*, 2018, **26**, 5052-5059.
7. S. Li, J. Gao, X. Cao, Z. Zhang, Y. Zheng and C. Zhang, *Opt Express*, 2015, **23**, 3523-3533.
8. H. X. Zhang, Z. R. Jia, A. L. Feng, Z. H. Zhou, L. Chen, C. H. Zhang, X. H. Liu and G. L. Wu, *Compos Part B-Eng*, 2020, **199**.
9. Y. C. Qing, D. D. Min, Y. Y. Zhou, F. Luo and W. C. Zhou, *Carbon*, 2015, **86**, 98-107.
10. S. C. Dang, Y. Lin, X. Z. Wei and H. Ye, *J Mater Sci-Mater El*, 2018, **29**, 17651-17660.
11. Y. X. Huang, X. J. Yuan, M. J. Chen, W. L. Song, J. Chen, Q. F. Fan, L. Q. Tang and D. N. Fang, *Carbon*, 2019, **144**, 449-456.
